# Supplementary material for: Quality of life of cutaneous leishmaniasis suspected patients in the Ecuadorian Pacific and Amazon regions: a cross sectional study
Source: BMC Infect Dis. 2022 Sep 24;22:748. doi: 10.1186/s12879-022-07733-4 (PMC9509548; doi:10.1186/s12879-022-07733-4)
Supplement: Supplementary file 1 — Additional file 1: Table S1. Skindex-29 results. Individual patient variables and Skindex-29 scores. [file 12879_2022_7733_MOESM1_ESM.xlsx]

## Sheet: Study results
Record Id	Ethnicity	Infected in the Amazon	Health seeking delay	Lesion type: Ulcer	Lesion type: Nodular	Lesion type: Other	Number of lesions	Lesion on the head	Lesion on the arms	Lesion on the legs	Trunk	CL confirmed	Skindex_1	Skindex_2	Skindex_3	Skindex_4	Skindex_5	Skindex_6	Skindex_7	Skindex_8	Skindex_9	Skindex_10	Skindex_11	Skindex_12	Skindex_13	Skindex_14	Skindex_15	Skindex_16	Skindex_17	Skindex_18	Skindex_19	Skindex_20	Skindex_21	Skindex_22	Skindex_23	Skindex_24	Skindex_25	Skindex_26	Skindex_27	Skindex_28	Skindex_29
1	0	0	0.233333	1	0	0	2	1	0	0	0	1	4	1	1	1	1	1	2	1	3	5	1	1	2	1	1	2	1	1	1	1	1	1	4	1	1	4	1	1	1
2	0	0	0.233333	0	1	0	1	0	1	0	0	0	2	1	1	1	1	1	2	1	1	2	1	1	1	1	1	1	1	2	1	1	1	1	2	1	1	1	1	1	1
3	0	0	0.233333	1	0	0	1	0	1	0	0	0	5	1	3	5	5	4	5	1	1	5	4	4	4	4	2	1	3	2	3	3	2	1	1	4	1	1	1	1	1
4	0	0	0.466667	1	0	0	1	0	1	0	0	0	2	1	1	4	5	1	2	1	1	3	4	3	1	1	1	1	2	1	4	2	4	1	1	3	1	1	1	1	1
5	0	0	0.466667	1	0	0	1	0	0	0	1	0	2	4	4	3	4	4	2	4	4	2	4	3	4	4	4	2	3	2	3	3	3	4	2	4	3	2	4	4	3
110001	1	1	0.233333	1	0	0	1	0	1	0	0	0	5	3	2	3	1	4	3	3	3	3	4	2	3	1	2	5	1	5	1	3	5	2	1	3	1	3	2	5	1
110002	2	1	4	1	0	0	5	0	1	0	0	0	1	1	2	3	1	1	3	1	1	3	1	1	3	3	1	1	1	4	1	1	1	1	3	1	1		2	1	1
110003	0	1	2	0	1	0	3	1	0	0	0	1	4	5	5	5	5	5	5	5	5	5	5	5	5	5	5	5	5	5	5	5	5	5	5	5	5	5	5	1	5
110004	0	1	2	1	0	0	1	0	0	1	0	1	1	1	3	1	1	1	3	4	2		1	1		2	1	1	1	1	1	2	1	1	3		1	2	1	1	1
110005	3	1	8	1	0	0	1	0	1	0	0	0	1	1	4	1	3	1	1	1	3		3	1	3	1	2	1	1	3	3	3	3	2	2	1	1	2	1	1	1
110006	2	1	4	1	0	0	1	0	1	0	0	1	1	2	5	3	3	5	1	3	5	3	3	3	5	1	1	2	1	1	3	1	1	1	1	2	2	1	2	1	1
110007	0	1	0.466667	1	0	0	1	0	0	1	0	0	5	3	5	5	4	5	4	4	4	4		2	5	2	1	1	3	5	3	4	4	4	5	4	3	4	1	4	4
110008	2	1	2	1	0	0	1	0	1	0	0	0	5	4	5	3	4	4	4	2	5	5	3	5	5	1	3	5	3	5	1	3	3	5	5	1	5	5	5	1	1
110009	2	1	1	1	0	0	1	0	0	0	1	1	3	1	1	3	1	1	1	1	5	2	1	1	1	2	1	1	3	2	1	3	1	3	2	1	2	1	1	1	2
110011	2	1	0.233333	1	0	0	1	0	0	1	0	1	2		4	5	3	3	2	3	5	3	2	5	3	2	2	3	5	3	2	3	2	3	2	5	2	3	2	1	2
110013	0	0	0.466667	1	0	0	1	1	0	0	0	0	4	3	2	3	5	5	3	3	5	3	1	1	5	1	1	1	1	3	1	1	1	1	3	1	1	3	1	1	1
110015	0	0	6	1	0	0	1	0	1	0	0	0	3	1	1	1	1	1	1	1	1	1	1	1	1	1	1	1	1	1	1	1	1	1	1	1	1	1	1	1	1
110016	0	0	0.466667	1	0	0	3	1	0	0	0	0	3	1	1	2	2	2	3	1	1	1	1	1	1	1	1	1	1	1	1	1	1	1	1	1	1	1	1	1	1
110017	0	0	1	1	0	0	1	0	0	1	0	1	1	1	3	1	3	3	1	1	5	5	1	4	5	1	1	1	1	1	1	2	1	1	3	1	1	1	3	1	1
110018	0	0	0.466667	1	0	0	2	1	0	0	0	0	5	1	5	5	1	1	3	1	5	3	1	1	3	1	1	1	1	4	1	2	1	1	3	1	1	1	1	1	1
110019	0	0	0.7	1	0	0	1	0	0	1	0	0	1	1	3	2	5	5	1	5	5	1	5	5	5	1	2	2	2	2	5	5	5	5	2	5	5	2	5	1	1
110020	0	0	0.466667	1	0	0	1	0	0	1	0	1	5	5	4	4	5	5	3	5	5	5	5	4	3	1	1	1	1	4	1	1	1	1	1	1	1	4	1	1	1
110021	0	0	1	1	0	0	3	1	0	0	0	0	1	1	2	1	2	3	1	2	1	1	1	1	1	1	1	1	1	1	1	2	1	2	1	1	1	1	1	1	1
110022	0	0	1	1	0	0	1	0	0	1	0	1	2	3	5	1	1	1		1	1	3	1	1	4	1	1	1	1	3	1	1	1	1	2	1	1	4	1	1	1
110023	0	0	0.466667	1	0	0	1	0	0	0	1	1	1	1	1	1	1	1	1	1	1	1	1	1	1	1	1	1	1	1	1	1	1	1	1	1	1	1	1	1	1
110024	0	0	0.233333	1	0	0	1	0	1	0	0	0	2	1	3	1	1	1	1	1	5	5	1	1		1	1	5	1	5	1	1	2	2	5	2	2	4	2	2	2
110025	0	0	2	1	0	0	1	0	1	0	0	0	1	1	3	1	1	1	2	1	3	1	1	1	1	1	1	1	1	1	1	1	1	1	1	1	1	1	1	1	1
110026	0	0	1	1	0	0	2	0	1	0	0	0	1	1	1	1	1	1	1	1	1	1	1	1	1	1	1	1	1	1	1	1	1	1	1	1	1	1	1	1	1
110027	0	0	0.466667	1	0	0	1	0	1	0	0	0	1	1	1	1	1	1	1	1	1	1	1	1	1	1	1	1	1	1	1	1	1	1	1	1	1	1	1	1	1
110028	0	0	0.466667	1	0	0	2	1	0	0	0	0	1	1	3	1	1	2	1	1	4	2	1	1	4	1	1	1	2	3	1	1	1	1	1	1	1	1	2	1	1
110029	0	0	1	1	0	0	1	0	0	0	1	0	2	2	1	2	1		1	2	1		2	1	1	1	1	1	1	1	1	1	1	1	1	1	1	1	1	1	1
110030	1	1	1	1	0	0	1	0	1	0	0	0	2	3	4	3	3	2	2	1	5	2	1	4	5	3	1		1	4	1	2	1	3	4	2	4	2	2	4	2
110031	0	1	1.4	1	0	0	2	0	1	0	0	0	2	1	4	3	1	3		1	4	4	1	2	5	1	1	4	1	4	1	1	1	1	2	1	1	1	1	1	1
110032	1	1	7	1	0	0	6	1	0	0	0	1	3	1	5	1	4	5	3	3	4	1	3	3	4	3	2	1	1	4	4	4	1	2	4	3	3	1	1	1	1
110034	0	0	0.466667	1	0	0	1	1	0	0	0	0	2	1	4	1	1	1	3	2	4	1	2	1	2	3	1	3	2	5	1	1	1	1	5	1	1	1	1	1	1
110037	0	0	0.233333	1	0	0	1	0	1	0	0	0	1	1	1	4	4	1	1	2	1	1	1	1	1	1	1	1	1	1	1	1	1	1	1	1	1	1	1	1	1
110038	0	0	0.466667	1	0	0	2	0	1	0	0	0	5	5	5	1	1	5	5	4	1	5	3	1	1	1	5		1	5	1	1	1	5	5	1	1		5	1	1
110052	0	0	1	1	0	0	1	0	0	1	0	0	3	1	3	1	1	2	3	1	3	1	1	1	4	1	1	2	1	4	1	3	1	1	1	1	3	2	1	1	1
110054	0	0	2	1	0	0	1	0	0	1	0	1	3	3	2	2	1	2	3	2	2	3	1	1	3	1	1	2	1	3	1	2	1	1	3	1	1	1	1	1	1
110055	1	1	24.3333	0	1	0	1	0	1	0	0	1	5	5	5	5	5	4	5	5	5	5	5	5	5	5	4	5	5	5	5	5	5	5	4	5	5	5	4	4	5
110056	0	0	0.466667	1	0	0	2	1	0	0	0	0	3	3	4	1	1	1	3	1	2	3	1	1	4	1	1	1	1	3	1	1	1	1	3	1	1	3		1	1
110059	0	0	0.7	1	0	0	1	0	1	0	0	0	3	1	1	3	4	4	3	1	5	1	1		3	1	3	1	1	1	1	1	1	1	2	2	3	2	3	3
110060	0	0	0.7	1	0	0	2	0	1	0	0	0	3	1	3	1	1	1	3	1	3	3	1	1	3	1	3	1	1	3	1	3	1	1	2	1	2	2	2	1	1
110061	0	0	0.466667	1	0	0	1	1	0	0	0	0		1	1	2	1	3	4	1	3	4	2	2	4	1	1	2	1	2	1	1	1	2		1	1	1	1	1	1
110062	0	0	0.466667	1	0	0	1	1	0	0	0	0	3	1	4	1	2	4	4	1	4	3	1	1	1	1	1	1	1	1	1	1	1	3	1	5	1	3	1	1
110063	0	0	0.466667	1	0	0	1	0	1	0	0	0	5	1	5	1		5	3	3	1	1	1	5	5	1	5	1	3	4	5	4	1	1	5	1	5	5	5	1	1
110064	0	0	0.466667	1	0	0	1	1	0	0	0	0	4	1	2	1	1	1	3	1	3	3	1	1	1	1	3	3	3	3	3	1	1	1	5	2	1	3	1	1	1
110065	0	1	0.233333	1	0	0	1	1	0	0	0	0	1	1	1	1	1	1	1	1	1	1	1	1	1	1	1	1	1	1	1	1	1	1	1	1	1	1	1	1	1
110066	0	0	0.233333	1	0	0	1	0	1	0	0	1	3	1	3		4	2		1	2	4	1	1	3	1	1	3	1	3	1	2	1	1	5	1	1	1	1	1	1
110067	0	0	0.466667	1	0	0	1	0	1	0	0	0	4	1	5	1	1	1	4	1	4	4	1	1	4	1	1	2	1	3	1	1	1	1	3	1	1	3		1	1
110068	2	1	1	1	0	0	4	0	0	1	0	0	1	3	3	3	5	3	1	3	3	5	5	5	3	3	5	3		5	5	3	5	5	5	5	3	3	3	3	1
110069	0	1	3	1	0	0	1	0	0	1	0	0	3	3	3	4	4	3	4	1	4	3	4	1	4	1	4	4	3	4	3	4	4	4	4	4	4	5	4	1	4
110070	1	1	1.4	1	0	0	1	0	0	1	0	1	3	2	5	2	2	3	3	1	2	2	3	2	3	2	3	4	3	3	2	3	1		2	2		1	2	1	2
110071	1	1	0.233333	1	0	0	1	0	0	0	1	1	5	5	5	5	4	4	4	4	5	4	4	3	5	4	5	3	5	5	5	4	4	5	5	5	5	3	4	5	4
110072	0	0	1.4	1	0	0	2	0	0	1	0	0	5	4	5	5	5	4	5	3	5	5	4	4	5	4	5	5	4	5	4	5	4	5	5	5	3	3	3	1	5
110073	0	0	0.466667	1	0	0	1	0	1	0	0	0	5	3	5	1	3	4	3	2	4	3	3	5	5	2	4	5	4	5	3	4	3	4	4	4	5	4	3	1	3
110074	0	0	60.8333	1	0	0	1	0	0	1	0	1	2	4	4	4	4	4	5	3	4	5	3	3	4	3	3	2	2		1	2	1	2	4	1	1	3	1	1	1
110075	0	0	2	1	0	0	1	0	1	0	0	0	2	5	5	1	1	2	1	1	2	1	1	5	5	1	1	1	1	5	2	1	1	1	5	1	2	1	1	1	1
110076	0	0	1.63333	1	0	0	1	0	1	0	0	0	2	1	5	1	4	3	3	1	5		4	4	5	1	2	3	1	1	1	5	1	3	4	2	1	3	3	1	1
110077	0	0	0.7	1	0	0	1	0	1	0	0	0	2	1	5	5	5	4	3	1	5	2	3	1	5	3	3	1	1	3	3	3	1	3	3	1	2	3	1	1	1
110078	0	0	0.233333	1	0	0	1	0	0	0	1	1	1	1	4	1	1	1	1	1	3	1	1	1	4	1	4	2	1	1	1	1	1	1	1	1	1	1	1	1	1
110079	0	0	0.233333	1	0	0	1	0	0	1	0	0	3	1	5	1	1	1	5	1	5	5	1	1	5	1	1	1	1	5	1	1	1	1	5	1	1	1	1	1	1
110080	0	0	1.4	1	0	0	1	1	0	0	0	1	5	5	5	5	5	5	5	5	5	5	5	5	5	5	5	5	5	5	5	5	3	5	5	5	3	5	5		5
110081	0	0	0.466667	1	0	0	1	0	0	0	1	0	5	3	5	5	5		3		3	1	5	3	5	1	1	5	5	5	5	5	5	1	5	5	1	1	1	1	1
110082	0	0	0.233333	1	0	0	1	0	0	1	0	0	1	1	3	1	1	1	3	1	5	5	1	1	3	1	1	4	1	2	1	1	1	1	2	1	1	1	1	1	1
110083	0	0	0.233333	1	0	0	1	1	0	0	0	1	4	5	5	1		3	5	1	4	5	3	1	5	1	4	1	3	3	5	3	5	2	5	2	1	4	4	1	4
110084	0	0	2	1	0	0	1	0	1	0	0	0	5	4	5	3	2	2	5	1	5	3	1	1	5	1	1	4	1	5	1	1	1	1	5	1	1	2	1	1	1
110086	0	1	0.466667	1	0	0	1	0	1	0	0	0	2	2	4	3	2	2	4	2	3	4	2	1	4	2	2	2	2	4	3	3	2	3	4	2	2	2	2	1	2
110087	2	1	0.466667	1	0	0	1	0	0	0	1	1	5	4	5	5	5	5	5	5	4	4	4	4	5	4	1	4	5	5	4	4	5	4	4	4	1	1	2	4	4
110088	0	0	0.7	1	0	0	1	1	0	0	0	0	1	3	2	3	3	3	3		2	3	3	3	3			1			3	4		1		1	3	1	1	1	1
110089	0	0	0.233333	1	0	0	1	1	0	0	0	0	1	1	5	1	1	1	1	1	1	4	1	1	5	1	1	1	1	5	1	1	1	1	5	1	1	1	1	1	1
110090	0	0	1	1	0	0	1	0	0	1	0	0	1	1	1	1	1	1	1	1	1	1	1	1	1	1	1	1	1	1	1	1	1	1	1	1	1	1	1	1	1
110091	0	0	0.466667	1	0	0	1	0	0	0	1	1	3	1	4	1	1	1	1	1	3	4	1	2	5	1	1	1	1	5	1	2	1	3	2	1	1	4	2	1	1
110092	0	0	1.86667	1	0	0	1	0	1	0	0	0	1	1	1	3	4	1	1	4	3	1	3	3	3	3	3	3	3	4	4	3	3	3	3	3	3	1	3	4	1
110093	0	0	3	1	0	0	1	1	0	0	0	0	1	1	5	1	1	1	1	1	3	1	1	1	5	1	1	1	1	2	1	1	1	1	1	1	1	1	1	1	1
110094	0	0	3	1	0	0	1	0	1	0	0	0	3	1	1	1	1	1	1	1	5	3	1	1	5	1	1	1	1	1	1	1	1	1	3	1	1	1	1	1	3
110095	0	0	1	1	0	0	1	0	1	0	0	0	2	1	4	1	1	1	2	1	5	5	1	1	2	1	1	1	1	1	1	1	1	2	1	1	1	1	1	1	1
110096	0	0	1	1	0	0	1	0	1	0	0	0	1	1	5	1	1	1	1	1	1	1	1	1	5	1	1	2	1	2	1	1	1	1	1	1	1	1	1	1	1
110097	0	0	36.5	1	0	0	1	0	0	1	0	1	5	1	5	5	1	1	5	1	2	1	1	1	5	1	1	1	1	5	1	1	1	1	1	1	1	1	1	1	5
110098	0	0	0.233333	1	0	0	1	1	0	0	0	0		1	5	1	1	2	4	1	1	4	1	2	3	1	2	3	1	5	1	1	1	1	5	1	1	3	1	1	1
110099	0	0	0.933333	1	0	0	2	1	0	0	0	0	3	4	4	4	4	4	4	4	4	4	4	4	4	4	4	4	4	4	4	3	4	4	4	4	4	4	4	4	4
110100	0	0	0.466667	1	0	0	2	0	0	0	1	0	4	3	2	2	1	3	3	3	4	5	4	5	4	2	1	2	4	5	4	3	2	4	5	5	1	4	1	1	1
110101	0	0	2	1	0	0	2	0	1	0	0	0	3	2	3	2	1	1	3	2	3	2	2	3	3	2	3	3	2	4	2	2	2	2	3	2	2	1	2	1	1
110102	0	0	0.933333	1	0	0	1	1	0	0	0	0		3	5	1	2	3	3	3	3	3	1	1	5	1	1	3	1	3	1	1	1	1	3	1	1	1	1	1	1
110103	0	0	0.7	1	0	0	1	0	1	0	0	0	2	1	4	3	3	3	3	3	3	3	3	3	4	3	3	4	3	3	3	3	2	3	3	3	3	2	3	1	3
110104	0	1	1.4	1	0	0	1	0	0	1	0	1	4	3	5	3	3	2	4	5	3	5	2	2	4	1	2	3	1	5	1	2	2	3	4	2	1	3	3	1	3
110105	2	1	2	1	0	0	1	0	0	0	1	1	5	5	5	5	5	4	5	5	5	5	4	5	4	5	3	5	3	4	4	5	5	4	5	5	4	4	4	4	3
110106	2	1	24.3333	1	0	0	1	0	1	0	0	0	3	2	5	4	5	3	4	5	5	3	2	5	5	3	4	5	2	4	5	4	4	3	4	5	4	4	3	2	4
110107	1	1	12.1667	0	1	0	1	0	1	0	0	0	4	1	5	1	1	3	1	1	1	5	1	1	5	1	1	1	1	1	1	1	4	1	4	1	1	4	1	1	1
110108	1	1	1	1	0	0	1	0	0	1	0	0	5	5	5	5	5	5	5	5	5	5	5	5	5	5	5	5	5	5	5	5	5	5	5	5	5	5	5	5	5
110109	2	1	0.466667	1	0	0	1	1	0	0	0	0	5	1	1	3	1	2	1	1	5	1	5	1	1	3	1	1	1	1	1	1	1	1	3	1	3	1	1	1	1
110110	2	1	6	1	0	0	1	0	0	1	0	0	5	5	4	5	4	3	2	1	5	5	2	5	5	3	3	1	2	4	2	4	2	1	1	2	4	3	2	3	4
110112	0	1	4	1	0	0	1	0	1	0	0	0	1	4	5	1	5	4	3	2	3	2	1	1	5	1	1	4	4	5	4	4	1	5	5	5	4	1	1	3	3
110113	2	1	0.466667	1	0	0	1	1	0	0	0	0	2	5	5	5	5	4	2	3	5	5	5	5	5	5	4	1	5	5	5	5	5	5	4	5	5	1	4	5	5
110114	1	1	1	1	0	0	1	0	1	0	0	0	3	1	5	1	5	5	3	1	5	5	5	5	5	1	5	5	5	5	5	4	5	5	4	5	5	4	5	1	3
110115	0	1	0.466667	1	0	0	1	1	0	0	0	1	5	4	5	2	3	3	1	1	1	4	1	1	5	2	5	5	1	5	2	4	5	5	2	4	2	3	5	1	3
110116	2	1	121.667	1	0	0	1	0	1	0	0	1	1	1	5	5	5	5	3	4	5	5	1	4	3	3	5	1	5	1	1	3	3	1	4	5	1		2	2	2
110117	2	1	2	1	0	0	1	0	1	0	0	0	4	1	5	1	1	5	5	3	5	3	1	1	1	1	5	5	5	4	1	1	5	1	4	1		1	5	1	1
110118	1	1	0.466667	1	0	0	1	0	0	1	0	1	4	5	5	5	5	5	4	3	5	5	4	4	5	5	4	5	4	4	1	5	4	1	4	4	1	1	4	5	1
110119	2	1	1.16667	1	0	0	3	0	1	0	0	1	3	3	5	3	4	4	3	3	3	3	5	5	3	3	5	5	4	4	3	3	5	5	4	5	5	4	3	2	4
110120	1	1	2	1	0	0	1	0	1	0	0	0	2	2	5	5	5	3	4	1	3	2	3	3	4	3	5	5	3	5	3	4	4	5	3	3	1	2	3	4	1
110121	0	1	1	1	0	0	1	0	0	1	0	0	1	3	5	5	4	5	3	3	5	2	3	5	5	5	5	4	5	2	5	5	5	5	5	5	5	3	5	5	5
110123	0	1	1.86667	1	0	0	1	1	0	0	0	0	1	3	5	2	2	2	1	3	5	2	3	1	5	2	3	2	3	1	2	2	2	3	1	2	2	3		1	1
110124	1	1	2	1	0	0	1	0	1	0	0	0	1	3	4	3	4	4	1	3	3	4	2	5	5	3	5	4	3	4	2	2	4	5	4	5	4	1	5		5
110125	1	1	243.333	1	0	0	2	0	0	1	0	1	5	5	4	5	5	5	5	5	4	5	5	5	5	4	5	5	5	5	5	5	5	5	5	5	5	5	5	5	5
110126	1	1	340.667	1	0	0	1	0	0	1	0	0	3	1	5	4	3	4	3	1	1	5	1	4	5	1	2	5	1	1	1	1	1	1	2	1	1	1	1	1	1
110127	1	1	24.3333	1	0	0	2	0	0	1	0	0	3	1	5	5	3	1	3	3	3	3	1	3	3	1	1	1	1	5	3	4	5	5	1	3	3	1	1	1	5
110128	0	1	0.7	1	0	0	1	1	0	0	0	1	3	2	5	1	1	2	4	3	1	5	2	1	5	1	1	1	1	4	1	2	1	1	3	1	1	4	1	1	2
110130	0	0	3	1	0	0	5	0	1	0	0	0	5	5	5	5	5	5	5	5	5	2	5	5	5	3	1	1	2	5	5	5	5	1	5	5	1	2	1	2	5
110131	1	1	4	1	0	0	1	1	0	0	0	1	5	3	5	5	3	5	5	5	5	5	3	5	5	3	3	5	3	5	3	1	3	3	5	5	3	3	3	1	5
110132	1	1	3	1	0	0	10	0	0	1	0	1	5	3	5	5	5	3	5	5	5	5	4	5	5	4	4	5	4	5	5	4	4	4	1	5	4	5	5	5	5
110133	1	1	85.1667	0	1	0	1	0	1	0	0	0	5	5	5	5	3	2	5	3	2	5	4	1	3	3	2	2	3	3	1	2	3	1	1	3	1	1	3	3	5
110134	2	1	14	1	0	0	1	0	1	0	0	0		4	5	4	4	3	3	1	3	4	4	4	4	2	1	4	4	4	3	3	2	3	3	2	4	4	1	1	3
110135	0	1	3	1	0	0	2	0	1	0	0	0	3	3	5	5	4	3	3	2	3	3	1	1	3	1	3	3	3	3	1	3	3	1	3	1	1	3	3	1	4
110136	1	1	2	1	0	0	1	0	0	1	0	1	2	3	5	5	4	5	3	3	5	3	5	5	5	4	4	5	4	3	5	5	5	5	4	5	5	3	5	3	4
110137	1	1	12.1667	0	1	0	1	0	1	0	0	1	1	1	1	1	3	1	1	1	1	3	3	3	1	1	1	1	1		3	3	2	1	5	3	3	1	1	3	1
110138	0	1	4	1	0	0	1	0	0	0	1	1	5	5	5	5	1	5	5	1	5	5	5	1	5	1	1	5	4	5	1	1	5	1	2	5	5	1	1	1	5
110139	0	1	2	1	0	0	1	0	1	0	0	1	3	2	3	2	2	2	1	1	3	3	1	1	3	1	3	1	3	5	1	1	1	1	2	1	1	2	2	1	1
110140	2	1	2	1	0	0	1	0	0	1	0	0	5	3	3	5	3	5	4	5	3	5	4	4	1	2	4	3	5	2	4	3	1	1	2	3	3	5	3	1	3
110141	2	1	0.233333	1	0	0	1	0	0	0	1	0	3	3	3	1	5	1	3	1	1	2	1	2	1	1	1	1	1	1	1	1	1	1	1	1	5	1	1	1	5
110142	2	1	1	1	0	0	1	0	0	1	0	1		3	3	3			1	3	5	5	1	1	1	1	1	1	1	1	3	4	1	1	3	1	3	3	1	1	1
110143	0	1	3	0	1	0	1	0	0	1	0	1	4	5	5	2	2	5	4	3	5	3	2	2	5	2	4	3	2	4	2	3	3	5	4	2	2	4	3	2	4
110144	1	1	3	1	0	0	10	1	0	0	0	0	3	2	5	5	5	3	2	1	3	3	3	4	5	1	4	2	2	5	3	2	2	5	5	3	2	1	5	1	1
110145	2	1	4	1	0	0	1	0	0	0	1	0	5	1	2	3	4	1	3	5	3	3	4	4	3	1	5	3	5	4	5	4	5	3	3	5	3	3	4	5	5
110146	0	0	3	1	0	0	5	1	0	0	0	0	3	5	5	5	5	5	5	5	5	3	5	5	5	3	1	1	2	5	5	5	5	1	5	5	1	2	1	2	5
110148	3	1	24.3333	1	0	0	1	0	0	1	0	1	5	3	5	5	5	3	2	3	5	3	5	3	5	5	5	3	5	5	5	5	5	3	5	5	3	3	3	3	5
110149	0	1	1	1	0	0	1	0	0	1	0	1	5	4	5	5	4	4	5	5	5	3	1	1	5	1	1	3	1	3	1	5	1	1	5	1	1	1	1	1	5
110150	0	1	4	1	0	0	10	0	1	0	0	0	4	1	5	3	1	3	3	3	3	5	4	3	3	3	5	1	5	5	3	3	3	3	5	5	1	3	3	1	3
110151	1	1	2	1	0	0	6	0	1	0	0	0	1	1	5	1	5	4	3	5	5	5	5	5	1	5	1	1	5	5	5	1	5	5	4	5	1	1	3	1	4
110152	0	1	0.466667	1	0	0	1	0	0	0	1	1	3	4	5	5	5	4	4	4	5	4	5	3	4	4	3	5	4	5	4	4	3	3	5	4	2	4	2	5	4
110153	1	1	1	1	0	0	1	0	0	1	0	0	3	1	4	1	1	1	3	1	1	5	5	5	1	5	2	5	5	2	5	3	5	1	1	5	3	5	5	1	5
110154	0	1	3	1	0	0	1	0	0	1	0	0	2	1	3	1	1	1	3	1	4	4	1	2	3	1	1	1	1	3	1	2	1	1	3	1	1	4	1	1	1
110155	1	1	12.1667	1	0	0	1	0	1	0	0	0	3	5	5	1	1	5	3	5	1	2	4	5	4	1	4	3	1	4	4	1	5	3	4	5	1	3	3	1	4
110157	0	0	0.233333	1	0	0	1	0	0	1	0	0	1	1	3	2	1	1	1	1	2	2	1	1	3	1	2	2	1	2	1	1	1	1	2	1	1	2	1	1	1
110159	0	1	2	1	0	0	1	0	0	1	0	1	1	1	5	3	1		1	1	1	3	1	1	5	1	1	1	1	5	1	1	1	1	5		3		1	1	1
110160	3	1	0.466667	1	0	0	1	0	0	0	1	1	3	1	4	2	2	2	3	1	2	3	4	2	4	2	2	3	1	4	3	4	3	2	4	2	2	3	2	4	2
110161	0	1	0.233333	1	0	0	1	0	1	0	0	0	3	3	5	5	5	3	3	4	5	5	3	1	5	5	4	1	3	5	3	5	5	3	5	3	1	1	3	1	1
110162	1	1	3	1	0	0	1	0	0	1	0	0	4	1	5	1	2	2	3	2	2	1	1	2	5	1	2	1	1	4	1	3	1	3	4	2	1	1	2	1	1
110163	0	1	0.466667	1	0	0	2	0	0	1	0	1	3	2	5	5	4	3	4	3	3	4	3	2	4	4	5	3	3	4	3	4	2	4	4	3	3	4	4	2	1
110164	0	0	1	1	0	0	1	0	1	0	0	0	1	1	1	1	1	1	1	1	1	1	1	1	1	1	2	2	1	3	1	2	1	1	1	1	1	1	1	1	1
110165	0	1	36.5	1	0	0	1	0	0	1	0	0	3	1	5	3	1	5	3	1	5	4	1	1	5	1	5	5	1	3	1	1	1	5	4	1	1	3	5	1	1
110166	2	1	0.466667	1	1	0	3	1	0	0	0	0	4	3	5	5	5	5	3	5	5	3	1	1	5	5	1	5	1	5	1	5	5	5	5	5	5	3	1	5	5
110167	1	1	146	1	0	0	1	0	1	0	0	0	1	1	3	3	1	5	3	1	3	3	3	1	5	4	1	1	3	1	3	1	3	1	5	3	1	3	1	1	5
110168	1	1	24.3333	1	0	0	1	0	0	1	0	0	5	1	3	5	5	1	5	5	5	3	5	1	5	1	1	1	3	5	3	3	5	5	5	3	1	5	1	1	5
110169	1	1	36.5	0	1	0	1	0	1	0	0	0	1	1	5	4	1	4	3	1	5	3	1	1	5	1	1	1	1	1	3	3	2	5	4	1	3	2	1	1	5
110170	0	1	1.16667	1	0	0	2	0	1	0	0	0	5	5	5	5	4	3	3	3	5	5	3	3	5	3	2	2	3	5	2	2	5	1	5	3	1	2	3	1	3
110171	0	1	1	1	0	0	1	0	0	1	0	0	1		5	1	1	1	1	1	1	3	1	1	1	1	1	1	1	3	1	1	1	1	1	1	1	1	1	1	1
110172	1	1	0.233333	1	0	0	1	0	0	0	1	0	4	5	5	1	4	5	5	5	4	5	1	1	5	5	1	5	5	4	5	1	5	1	5	5	3	4	1	1	3
110173	0	1	3	1	0	0	2	0	1	0	0	0	1	1	5	3	2	2	1	1	5	1	1	4	5	2	2	5	1	5	1	3	1	2	3	1	2	2	2	1	2
110174	1	1	0.466667	1	0	0	3	0	0	1	0	0	3	1	5	4	5	2	3	2	5	2	1	1	5	2	1	2	1	3	2	2	1	1	2	1	1	3	1	3	2
110175	0	1	0.466667	1	0	0	1	0	0	0	1	1	5	5	5	1	1	1	5	1	1	5	1	1	5	1	1	5	1	5	1	1	1	1	5	1	1	4	5	2	5
110176	0	1	1	1	0	0	1	0	0	1	0	1	3	2	3	5	2	4	3	3	1	2	3	1	5	5	3	5	1	4	4	5	4	1	4	1	4	1	3	5	4
110177	0	1	1	1	0	0	1	0	1	0	0	0	5	4	5	5	5	5	5	3	5	5	5	4	5	4	5	2	4	5	5	5	5	4	5	5	4	4	4	4	3
110178	0	1	0.233333	1	0	0	8	0	0	1	0	0	1	1	3	1	1	1	2	1	5	3	1	1	5	1	1	2	1	5	1	2	1	1	2	1	1	2	1	1	1
110179	0	1	0.233333	1	0	0	1	0	1	0	0	0	2	1	1	1	1	1	3		1	3	1	1	3	1	1	1	1	3	1		1	1	1	1	1	3	1	1	1
110180	2	1	3	1	0	0	2	0	1	0	0	0	3	1	1	3	1	3	3	1	3	5	1	3	3	3	1	3	1	3	1	1	3	3	3	1	1	3	1	1	3
110181	1	1	0.466667	1	0	0	2	0	0	1	0	1	3	4	5	3	1	2	4	3	5	4	1	5	5	5	4	2	5	5	1	3	1	5	5	1	1	3	5	1	4
110182	1	1	0.7	1	0	0	1	0	0	1	0	0	5	3	1	3	5		5	5	1	5	1	1	1	5		3	4		5	5	1	5	2	5	4	3	1	2	5
110184	0	1	12.1667	1	0	0	1	0	0	1	0	1	4	3	5	5	5	5	5	5	1	1	3	3	5	3	5	5	2	5	2	3	5	5	5	5	3	1			3
110185	0	1	2	1	0	0	1	0	0	1	0	0	3	1	4	1	3	3	3	1	3	4	3	3	4	3	3	4	3	4	3	3	3	3			2	1	4	1	1
110186	1	1	3	1	0	0	1	0	0	1	0	0	3	1	3	5	2	5	3	2	2	1	5	5	2	1	2	5	5	3	5	5	5	5	5	3	2	1	3	5	5
110187	0	1	0.233333	1	0	0	1	0	0	0	1	0	3	2	5	3	2		2	1	3	3	2	2	2	1	1	1	1	3	3	1	3			1	1	3		1	1
110188	0	1	0.466667	1	0	0	3	0	0	1	0	1	3	2	5	4	5	3	4	4	4	4	4	5	5	4	3	2	3	5	4	4	4	4	4	4	3	4	3	1	3
110189	0	1	1	1	0	0	1	0	0	1	0	0	1	2	3	3	2	2	2	2	3	3	1	1	2	1	1	2	1		1	1	1	1	2	1	1	1	1	1	1
110190	3	1	0.466667	1	0	0	1	1	0	0	0	0	3	5	4	5	4	5	3	1	1	5	5	5	5	5	5	4	5	5	5	5	5	4	5	5	5	3	5	5	5
110191	3	1	3	1	0	0	1	0	0	0	1	0	3	3	5	5	5	5	4	5	1	1	5	5	5	5	5	5	5	5	5	5	5	5	5	1	5		3	1	5
110193	3	1	5	1	0	0	1	0	0	1	0	0	4	1	2	1	1	1	1	1	1	5	1	1	2	1	1	1	1	2	1	1	2	1	3	1	1	1	1	1	1
110200	1	1	1	1	0	0	1	0	1	0	0	0	5	2	2	3	5	5	5	3	3	5	2	2	2	5	5	5	5	3	3	5	5	5	2	5	4	4	5	1	5
110201	0	1	1.4	1	0	0	1	0	0	1	0	0	1	1	4	2	5	2	2	2	4	5	4	2	5	2	2	1	3	5	2	4	2	2	1	2	1	4	1	1	1
110202	2	1	3	1	0	0	1	0	1	0	0	0	5	4	4	5	3	4	5	3	4	5	4	5	5	3	5	4	4	5	4	5	5	4	5	4	5	4	5	1	5
110203	2	1	12.1667	0	1	0	1	1	0	0	0	1	4	5	5	5	5	5	5	1	5	5	5	5	5	4	5	5	5	4	5	5	5	5	5	5	5	4	5	5	5
110204	2	1	2	1	0	0	2	0	0	1	0	0	5	5	5	4	5	5	5	3	2	5	4	5	5	3	3	4	3	5	4	5	5	5	5	5	5	5	5	1	5
110205	2	1	2	1	0	0	1	0	0	1	0	0	3	5	4	1	5	3	5	3	5	5	3	1	5	3	5	4	3	5	3	4	4	3	5	3	1	5	3	1	3
110206	2	1	3	1	0	0	3	1	0	0	0	1	5	3	3	1	1	1	1	4	3	5	3	1	4	1	1	4	3	5	3	3	4	5	5	4	4	4	5	1	4
110207	2	1	5	1	0	0	1	1	0	0	0	0	5	1	3	5	3	3	5	3	5	5	5	5	3	5	5	5	3	5	3	5	3	5	5	5	3	3	5	3	2
110208	2	1	3	1	0	0	1	0	0	0	1	0	5	5	5	5	5	5	5	3	5	5	2	5	5	1	5	5	1	5	1	1	3	1	5	3	2	2	3	1	1
110209	2	1	2	1	0	0	1	0	0	1	0	0	5	3	5	3	3	1	3	1	3	3	1	1	5	3	1	3	1	1	3	3	1	1	1	1	3	1	3	1	1
110210	2	1	1	1	0	0	1	0	0	1	0	0	3	3	5	5	5	4	3	3	5	3	3	3	3	3	4	5	3	3	5	3	3	5	5	5	5	2	5	5	5
110211	2	1	1	1	0	0	1	0	0	1	0	0	3	1	2	1	1	1	3	5	1	1	1	5	5	3	1	2	3	3	1	4	3	5	4	5	3	1	2		1
110212	1	1	24.3333	0	1	0	1	0	1	0	0	0		1	3	2	1	1	5	1	5	5	5	5	3	5	5		5	2	1	5	2	3	5	3	5	3	2	1	1
110213	1	1	1.4	1	0	0	1	0	1	0	0	0	3	3	3	1	1	1	2	1	3	3	1	2	5	5	3	3	1	2	3	2	4	4	3	1	2	3	3	4	1
110214	2	1	7	1	0	0	1	0	1	0	0	0	5	1	2	3	4	1	3	5	3	3	4	5	3	1	5	3	5	4	5	4	5	3	3	5	3	3	4	5	5
110215	2	1	6	1	0	0	1	1	0	0	0	0	5	1	2	3	4	1	3	5	3	3	4	5	3	1	5	3	5	4	5	4	5	3	3	5	3	3	4	5	5
110216	2	1	4	1	0	0	1	0	1	0	0	0	5	1	2	3	4	2	3	5	3	3	4	5	3	1	5	3	5	4	5	4	5	3	3	5	3	3	4	5	5
110218	2	1	2	1	0	0	1	0	0	0	1	0	3	1	1	2	3	1	3	1	5	4	3		5	1	1	5	5	3	5	2	5	1	5	5	3	3	5	1	3
110219	0	0	0.466667	1	0	0	1	1	0	0	0	0	5	1	5	1	1	1	1	1	1	1	1	3	1	1	1	1	1	1	1	1	1	3	5	1	1	1	1	1	1
110220	0	0	0.466667	1	0	0	1	0	0	0	1	0	5	2	5	2	2	5		2	2	5	1	1	1	1	1	1	1	1	1	1	1	1	1	1	5	1	1	1	1
110221	0	0	0.466667	1	0	0	1	0	0	0	1	0	3	4	5	4	4	5	5	5	5	4	4	1	4	3	4	4	4	4	4	5	5	4	4	4	2	1	3	1	1
110222	0	0	0.466667	1	0	0	1	1	0	0	0	0	3	1	5	5	1	3		1	5	3	1	5	5	1	1	1	1	5	1	2	1	1		1	1	2	2	1	1
110223	0	0	1	1	0	0	4	1	0	0	0	0	2	1	5	1	1	5	5	5	5	5	1	2	5	2	4	5	1	5	1	4	2	2	5	2	1	1	4	1	4
110224	0	0	0.7	1	0	0	3	0	0	1	0	0	3	1	1	3		1	1	4	1	4	1	1	1	1	1	5	1	5	1	5	1	5	1	1	1	1	5	1	1
110225	0	0	1	1	0	0	2	1	0	0	0	0	5	3	5	5	4	4	5	3	3	5	3	3	5	3	3	4	2	5	2	2	2	4	5	1	1	5	1	1	5
110226	0	0	0.466667	1	0	0	1	0	1	0	0	0	3	1	1	1	1	1	5	1	1	1	1	1	1	1	3	5		1	1	1	1	1	5	1	1	5	1	5
110227	0	0	0.466667	1	0	0	1	0	0	0	1	0	5	1	5	1	1	1	5	1	1	5	1	1	3	1	1	1	1	5	1	1	1	1	1	1	5	1	1	1	1
110228	0	0	2	1	0	0	1	1	0	0	0	0	2	2	3	1	1	3	3	1	3	3	1	1	3	1	1	1	1	4	1	1	1	1	4	1	1	4	1	1	1
110229	0	0	2	1	0	0	1	0	0	0	1	0	5	2	5	5	3	3		3	5	5	3	1	5	1	3	5	3	5	2	3	1	2	5	3	1	3	3	3	5
110231	0	0	0.466667	1	0	0	1	0	0	1	0	0	5	4	5	3	4	3	3	2	2	5	2	2		1	3		4	5	2	2	1	3	5	4	1	2	2	1
110233	0	0	0.466667	1	0	0	1	1	0	0	0	0	1	1	1	1	1	1	1	1	1	1	1	1	1	1	1	1	1	1	1	1	1	1	1	1	1	1	1	1	1
110234	0	0	0.466667	1	0	0	1	1	0	0	0	0	3	1	3	1	1	2	3	1	3	4	1	1	3	1	1	3	1	3	1	1	1	1	3	1	1	3	1	1	1
110235	0	0	0.466667	1	0	0	1	0	1	0	0	1	2	1	5	1	1	1	5	1	5	1	1	1	1	5	1	1	1	5	1	1	1	1	5	1	1	1	1	1	1
110236	0	0	0.466667	1	0	0	1	0	1	0	0	0	3	1	5	1	2	3	4	5		1	1	2	5	2	5	2	4	5	1	4	5	5	5	5	5		5	1
110237	0	0	0.233333	1	0	0	1	0	1	0	0	0	1	5	1	1	1	1	5	1	2	5	2	3	5	1	1	2	2	5	1	5	1	1	5	1	1	5	1	1	1
110238	0	0	0.466667	1	0	0	2	0	0	1	0	1	2	3	5	1	5	5	3	3	5	4	4	5		2	3	3	3	3	4	4	4	4	5	4	3	3	3	2	2
110239	0	0	2	1	0	0	2	0	0	1	0	0	3	1	4	1	1	3	3	1	4	4	1	2	4	1	1	3	1	1	1	1	1	1	3		1	2		1	1
110240	0	0	0.933333	1	0	0	1	0	1	0	0	0	3	1	5	1	1	1	3	1	1	3	1	1	1	1	1	1	1	1	4	2	4	2	2		5	5		1	1
110241	0	0	0.466667	1	0	0	2	0	0	1	0	0	3	1	4	3	1	1	1	4	1	4	1	4	1	1	1	3	3	3	1	3	1	3	3	3	1	1	1	1	1
110243	0	0	0.7	1	0	0	1	1	0	0	0	0	1	1	3	2	1	1	1	1	1	1	1	1	3	1	1	1	1	1	1	1	1	1	1	1	1	1	1	1	1
110244	0	0	0.7	1	0	0	1	0	1	0	0	0	3	3	3	4	1	3	4	1	5	4	1	3	3	3	3	1	1	1	2	3	1	3	5	1	1	1	3
110245	0	0	0.233333	1	0	0	1	0	1	0	0	1	1	1	3	1	1	2	2	1	2	2	1	1	2	1	1	1	1	2	1	1	1	1	2	1	1	2	1	1	1
110246	0	0	3	1	0	0	1	0	1	0	0	1	1	1	3	1	1	1	4	1	1	4	1	1	1	1	1	1	1	1	1	1	1	1	1	1	1	1	1	1	1
110247	0	0	0.233333	0	1	0	2	1	0	0	0	1	3	1	1	1	1	1	1	1	1	1	1	1	1	1	1	1	1	1	1	1	1	1	1	1	1	1	1	1	1
110248	0	0	2	1	0	0	2	1	0	0	0	0	3	4	5	5	4	4	4	4	4	4	3	3	5	3	3	2	2	2	4	2	2	2	2	1	2	1	1	1	2
110249	0	0	1	1	0	0	1	0	1	0	0	1	3	1	5	3	2		4	4	5	5	2	5	5	2	2	1	2	4	2	4	2	2	2	4	2	2	2	1	1
110250	0	0	1	1	0	0	1	0	0	1	0	1	5	3	5	3	2	3	1	1	5	1	1	1	5	1	1	1	1	1	1	1	1	3	3	1	1	1	1	1	3
110251	0	0	3	1	0	0	1	0	1	0	0	0	1	1	1	1	1	1	3	1	5	3	1	1	5	1	1	1	1	1	1	1	1	1	1	1	1	1	1	1	1
110252	0	0	1	0	1	0	1	0	1	0	0	1	1	4	5	1	1	3	4	1	4	4	1	1	1	1	1	1	1	1	1	1	1	1	1	1	1	1	1	1	2
110253	0	0	0.233333	1	0	0	1	1	0	0	0	0	5	5	1	3	1	1	4	1	5	4	1	1	4	1	1	2	1	4	1	1	1	1	4	1	1	1	1	1	1
110254	0	0	0.466667	1	0	0	1	0	1	0	0	0	1	1	5	1	1	1	1	1	5	1	1	1	5	1	5	4	1	1	1	1	1	1	3	1	1	3	1	1	1
110255	0	0	2	1	0	0	1	1	0	0	0	0	1	1	5	1	1	1	5	1	5		1	1	5	1	1	1	1	1	1	1	1	1	1	1	1	1	1	1	1
110256	0	0	5	0	0	1	1	0	1	0	0	0	1	1	5	1	1	1	4	1	5	5	1	1	5	1	1	1	1	1	1	1	1	1	1	1	1	1	1	1	1
110257	0	0	1	1	0	0	1	0	1	0	0	1	5	1	5	1	1	1	5	4	1	5	1	1	1	1	1	1	1	4	1	1	1	1		1	1		1	1	1
110258	0	0	1	1	0	0	1	0	0	1	0	0	4	2	5	5	2	1	3	4	2	4	2	4		4	1	2	2	4	2	2	2	1	5	2	1	3	1	4	4
110259	0	0	2	1	0	0	1	0	1	0	0	0	1	3	5	1	1	1	1	1	5		1	1	5	1	1	4	1	1	1	1	1	1	1	1	1	1	1	1	4
110260	0	0	2	1	0	0	2	0	1	0	0	0	5	2	5	5	5	5	5	5	2	5	5	5	5	2	2	5	2	3	2	3	1	1	2	1	1	1	1	1	1
110261	0	0	8	1	0	0	1	0	0	1	0	0	5	1	5	3	1	1	4	1	2	4	1	1	2	1	2	1	1	5	1	1	1	1	5	1	1	2	1	1	1
110262	0	0	6	1	0	0	1	0	1	0	0	0	1	1	5	1	1	1	1	1	2	1	1	1	1	1	1	4	1	1	1	1	1	1	1	1	1	1	1	1	1
110263	0	0	1	1	0	0	2	0	1	0	0	1	3	1	5	1	1	4	3	1	4	1	4	1	4	1	2	1	1	1	1	1	1	4	1	2	1	1	1	1	1
110270	0	0	0.466667	1	0	0	1	0	0	0	1	0	4	1	4	1	3	4	4	1	4	4	1	1	4	1			1	4	1	1	1		4	1	1			4	1
110271	2	1		1	0	0	1	0	0	0	1	0		3	1	1	2	3	1	1	2	3	1	1	2	1	1	2	2	2	1	3	1	3	3	1	3	1	3	1	1
110272	0	0	0.466667	1	0	0	1	0	0	1	0	1	4	4	4	4	4	4	4	4	4	4	4	4	4	4	4	4	4	4	4	4	4	4	4	4	4	4	4	4	4
110273	2	1	5	1	0	0	2	0	1	0	0	0	3	3	2	3	3	1	3	3	5	3	3	1	3	2	3	2	2	3	2	1	3	2	3	2	2	1	3	2	3
110274	2	1	0.466667	1	0	0	1	0	1	0	0	0	3	4	3	1	1	1	1	1	4	5	1	5	5	1	1	1	1	1	1	3	5	2	4	1	5	2	1	1	5
110275	2	1	2	1	0	0	2	0	1	0	0	0	3	5	5	5	1	1	4	5	5	5	1	1	3	1	3	1	3	5	1	1	5	3	5	1	1	5	5	1	5
110276	2	1	1	1	0	0	2	0	1	0	0	0	5	3	3	5	1	1	1	5	3	3	1	5	3	5	1	1	1	5	4	3	5	5	3	1	3	1	1	1	1
110277	1	1	0.233333	1	0	0	4	0	1	0	0	0	5	1	5	2	2	2	3	1	4	5	2	5	5	1	5	3	4	2	5	5	5	5	3	4	1	2	3		1
110278	2	1	1	1	0	0	1	0	0	1	0	0	3	3	5	1	3	3	3	1	5	3	3	1	5	1	1	3	1	3	1	1	5	1	3	1	3	3	3	1	1
110279	2	1	2	1	0	0	2	0	0	1	0	0	2	3	3	3	3	3	3	3	5	3	3	3	3	3	1	5	1	3	3	3	3	3	3	3	3	3	3	1	3
110280	2	1	2	1	0	0	1	0	1	0	0	0	5	5	5	5	1	1	4	5	5	5	1	1	2	1	3	1	3	5	1	1	5	3	5	1	1	5	5	1	5
110281	0	0	4	0	0	1	1	0	0	1	0	0	2	1	5	1	2	1	2	5	5	5	5	1	3	1	1	1	1	1	1	1	1	2		1	1	2		1	1
110282	0	0	3	1	0	0	1	0	0	1	0	0	4	1	5	4	1	1	1	1	3	4	1	1	3	1	2	1	1	4	1	1	1	1	4	1	1	1	1	1	1
110283	0	0	1	1	0	0	2	0	1	0	0	0	4	3	5	2	1	1	3	1	3	3	1	2	4	2	3	4	1	1	1	2	1	2	5	1	2	1	1	1	1
110284	0	0	4	1	0	0	2	1	0	0	0	1	1	1	4	3	2	1	1	1	4	1	1	5	4	1	2	1	1	2	1	1	1		1	1	1	1	1	1	1
110285	0	0	1	1	0	0	1	1	0	0	0	0	4	4	5	5	5	1	1	2	5	5	1	4	5	2	1	5	1	3	1	4	1	1	4	1	1	3	1	1	1
110286	0	0	2	1	0	0	2	0	0	1	0	0	5	3	5	5	4	3	1	1	5	1	4	4	5	1	4	5	3	2	3	5	2	3	4	4	3	1	1	1	3
110287	0	0	3	1	0	0	1	0	1	0	0	0	1	1	5	4	4	4	1	4	4	5	4	5	5	4	4	3	4	3	4	4	3	4	3	4	4	2	4	2	2
110288	0	0	1	1	0	0	3	1	0	0	0	0	3	4	5	3	4	3	4	4	4	4	3	4	4	3	3	2	2	2	2	3	2	2	3	3	3	2	2	1	1
110289	0	0	1	1	0	0	1	0	1	0	0	0	5	5	5	5	5	5	5	5	5	5	5	5	5	5	5	5	5	5	5	5	5	5	5	4	3	4	3	4	1
110290	0	0						0	0	0	0	1	4	1	5	5	5	4	4	4	5	3	4	3	4	5	3	5	4	5	4	4	5	5	5	5	5	5	5	4	5
110295	0	0	1	1	0	0	2	0	1	0	0	0	5	1	5	1	5	5	1	3	5		1	5	3	5	2	1	3	1	1	5	1	1	2	5	2	2	1	1	1
110296	0	0	3	0	0	1	2	0	0	0	1	0	1	2	1	1	1	1	1	1	1	2	1	1	1	1	1	2	1	1	1	1	1	1	1	1	1	1	1	1	1
110297	0	0	4	0	0	1	1	0	0	0	1	1	1	2	1	1	1	2	5	1	1		1	1	1	1	1	3	1	1	1	1	1	1	1	1	1	1	1	1	1
110298	0	0	3	0	0	1	1	0	0	1	0	1	2	3	5	1	1	1	1	1	2	3	1	1	3	1	1	3	1	5	1	1	1	1	1	1	1	1	1	1	1
110299	0	0	2	1	0	0	2	0	1	0	0	0	2	1	5	2	3	1	1	1	5		3	3	5	2	2	1	1	2	1	4	1	1	2	1	1	1	1	1	1
110300	0	0	1	1	0	0	1	0	0	1	0	0	1	1	1	1	1	1	1	1	1	3	1	1	5	1	1	1	1	1	1	1	1	1	1	1	1	1	1	1	1
110301	0	0	1	1	0	0	2	0	0	1	0	0	5	1	1	4	1	1	1	1	1	5	1	1	1	1	1	4	1	2	1	1	1	1	2	1	1	2		3	1
110302	0	0	3	1	0	0	1	0	0	1	0	0	5	5	5	5	5	1	5	5	5	5	5	5	5	5	1	4	2	5	2	2	2	1	5	1	1	3	1	1	1
110303	0	0	1	0	1	0	2	0	0	1	0	0	1	1	4	1	1	1	1	1	1	1	1	1	1	1	1	1	1	1	1	1	1	1	1	1	1	1	1	1	1
110304	0	0	2	1	1	0	8	0	0	1	0	1	5	1	5	5	5	3	3	5	5	5	3	5	5	5	5	5	1	5	1	1	1	3	5	1	2	3	1	1	1
110305	0	0	3	0	1	0	1	0	0	1	0	0	3	1	4	3	1	3	3	1	5	3	1	1	5	1	1	1	1	5	1	1	1	1	5	1	1	2	1	1	3
110306	0	0	7	0	0	1	1	0	1	0	0	0	2	1	5	1	1	2	1	1	1	5	1	1	1	1	1	1	1	1	1	1	1	1	1	1	1	2	1	1	1
110307	0	0	2	1	0	0	2	0	0	0	1	0	1	4	5	1	1	3	4	1	3	2	1	1	5	1	1	1	1	4	1	1	1	1	3	1	1	1	1	1	1
110308	0	0	1	0	0	1	2	1	0	0	0	0	5	1	5	1	1	5	1	1	5	5	1	1	5	1	1	1	1	5	1	1	1	5	1	1	1	3	1	1	5
110309	0	0	2	0	0	1	8	0	0	1	0	0	1	5	1	3	1	2		1	5	5	1	1	5	1	1	1	1	2	1	1	1	1	1	1	1	1	1	1	1
110310	0	0	1	0	0	1	3	0	0	1	0	0	1	1	2	1	1	1	1	1	3	3	1	1	2	1	1	1	1	3	1	1	1	1	3	1	1	1	1	1	1
110311	0	0	3	0	0	1	1	0	0	1	0	1	5	1	5	1	1	1	5	1	5	5	1	1	5	1	1	5	1	5	1	1	1	1	5	1	1	1	1	1	1
110312	0	0	1	1	0	0	1	0	1	0	0	0	5	1	5	5	1	1	5	1	3	2	1	1	5	1	1	5	1	3	1	1	1	1	5	1	1	1	1	1	1
110313	0	0	2	1	0	0	1	0	0	1	0	0	5	1	5	5	5	1	1	4	1	5	1	1	1	1	1	4	1	1	1	1	1	1	2	1	1	1	1	1	1
110314	0	0	1	1	0	0	3	0	0	1	0	0	5	1	5	5	1	4	5	5	1	5	1	1	5	5	1	5	1	5	1	3	1	1	5	1	1	1	1	4	1
110315	0	0	1	1	0	0	1	0	0	1	0	0	1	1	5	1	1	1	1	1	3	1	1	1	1	1	1	1	1	1	1	1	1	1	1	1	1	1	1	1	1
110316	0	0	2	0	1	0	1	0	1	0	0	0	1	1	5	1	1	3	3	1	3	3	1	1	1	1	4	2	1	1	1	1	1	1	1	1	1	1	1	1	1
110317	0	0	5	0	1	0	1	0	1	0	0	1	3	1	5	1	1	1	1	1	1	1	1	5	1	1	1	1	1	1	1	1	1	1	1	1	1	1	1	1	1
110318	0	0	2	1	0	0	1	0	1	0	0	0	1	2	5	2	1	2		1	1	5	1	1	5	1	1	5	1	3		3	1	1		1	1	2	1		1
110319	0	0	0.7	1	0	0	1	0	0	0	1	0	3	1	5	1	1	1	1	1	5	5	1	1	5	1	1	1	1	5	1	5	1	5	5	1	1	1	1	1	1
110320	0	0	2	1	0	0	3	0	0	1	0	0	4	2	5	2	2	1	3	1	5	2	1	1	5	1	1	2	1	2	1	1	1	1		1	1	2		1	1
110321	0	0	1	1	0	0	1	1	0	0	0	0	1	3	5	2	5	1	4	5	5	5	4	5	5	5	2	2	1	2	2	5	5	4	3	3	1	2	3	1	4
110322	0	0	1	1	0	0	2	0	0	1	0	0	3	3	5	1	1	1	3	1	4	1	1	1	3	1	1	3	1	2	1	1	1	1	2	1	1	1	1	1	2
110323	0	0	4	1	1	0	3	0	0	1	0	1	5	1	5	5	1	4	4	4	3	2	3	2	5	2	3	5	2	5	5		2	2	2	2		2		1	5
110324	0	0	2	1	0	0	1	0	1	0	0	0	1	1	5	1	2	1	3	1	5	5	1	1	5	1	2	1	1	1	1	1	1	1	1	1	1	1	1	1	1
110325	0	0	1	1	0	0	2	0	0	1	0	0	3	1	2	1	1	1	1	1	3	3	1	1	2	1	1	1	1	3	1	1	1	1	3	1	1	1	1	1	1

## Sheet: Variables with field options
Variable	Option name	Option value
Ethnicity	Mestizo	0
Ethnicity	Kichwa	1
Ethnicity	Chicham	2
Ethnicity	Other	3
Infected in the amazon	Yes	1
Infected in the amazon	No	0
Health seeking delay	Health seeking delay	In months
Lesion type ulcer	Yes	1
Lesion type ulcer	No	0
Lesion type nodular	Yes	1
Lesion type nodular	No	0
Lesion type other	Yes	1
Lesion type other	No	0
Number of lesions	Number of lesions
Lesion on the head	Yes	1
Lesion on the head	No	0
Lesion on the arms	Yes	1
Lesion on the arms	No	0
Lesion on the legs	Yes	1
Lesion on the legs	No	0
Trunk	Yes	1
Trunk	No	0
CL confirmed	Yes	0
CL confirmed	No	1
Skindex_1-29	Never	1
Skindex_1-29	Rarely	2
Skindex_1-29	Sometimes	3
Skindex_1-29	Often	4
Skindex_1-29	All the time	5
